# Supplementary material
Source: PubMed Central journal article supplement (PMC6748261)

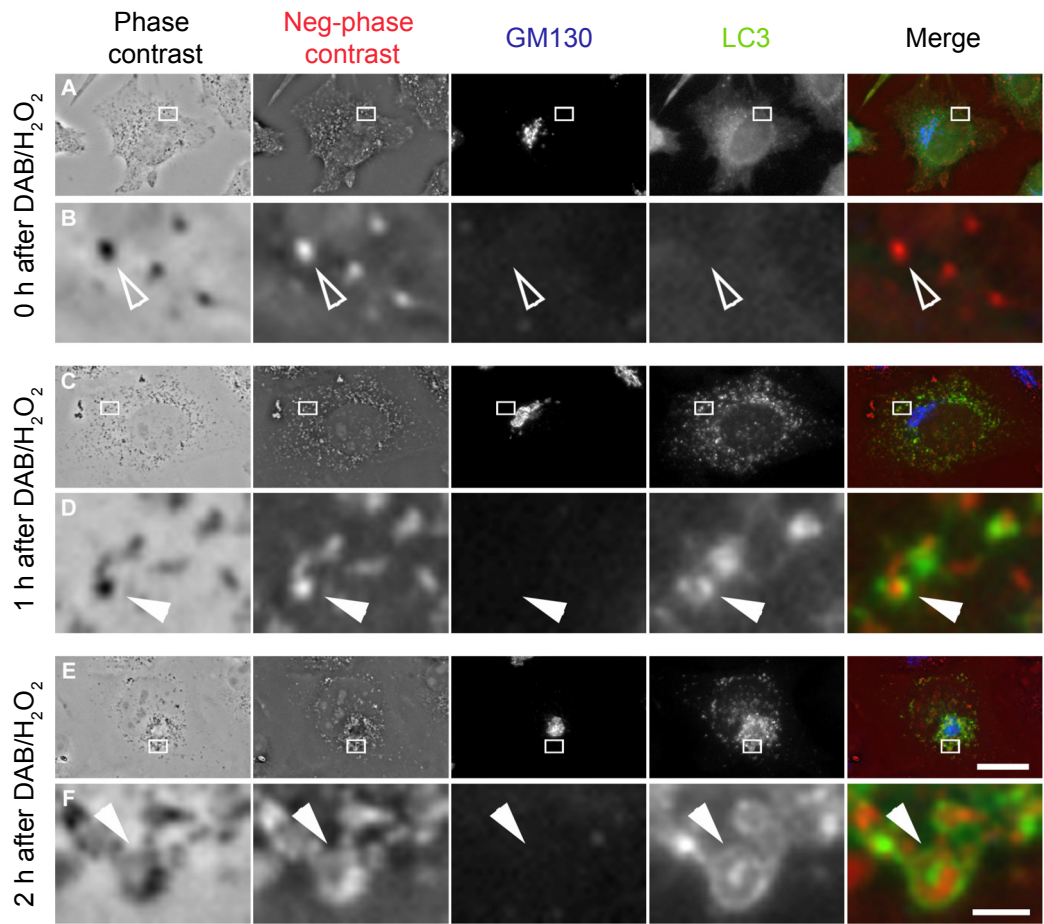

**Figure S1**

Supplement: 41418_2018_221_MOESM1_ESM.pdf [file 41418_2018_221_MOESM1_ESM.pdf]

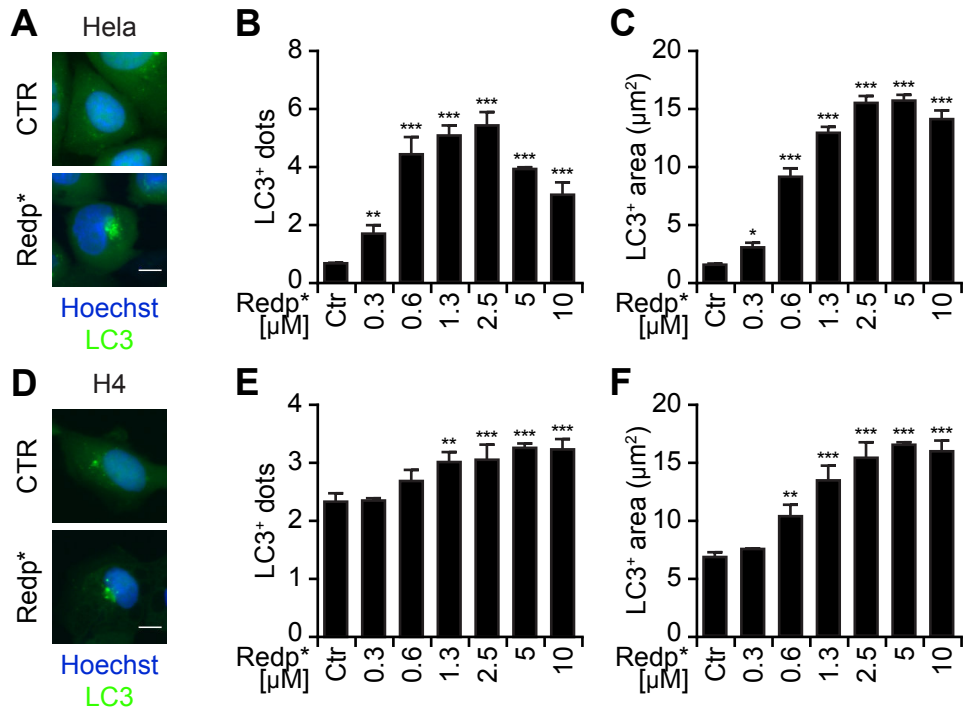

**Figure S2**

Supplement: 41418_2018_221_MOESM2_ESM.pdf [file 41418_2018_221_MOESM2_ESM.pdf]

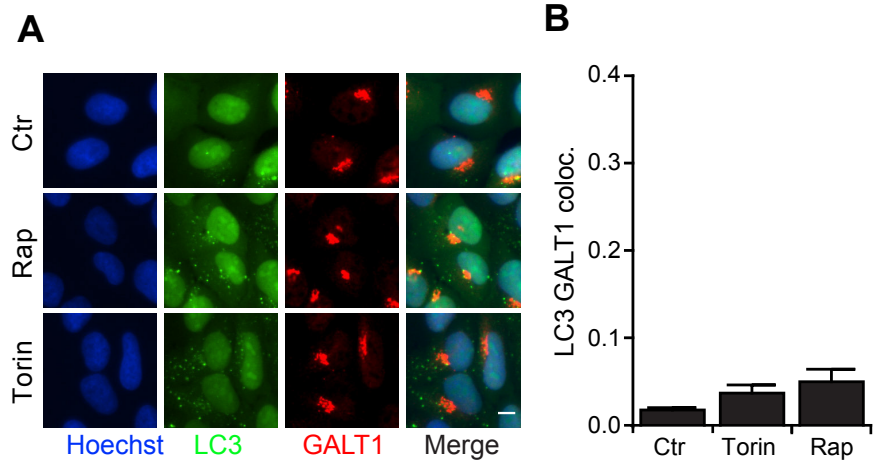

**Figure S3**

Supplement: 41418_2018_221_MOESM3_ESM.pdf [file 41418_2018_221_MOESM3_ESM.pdf]

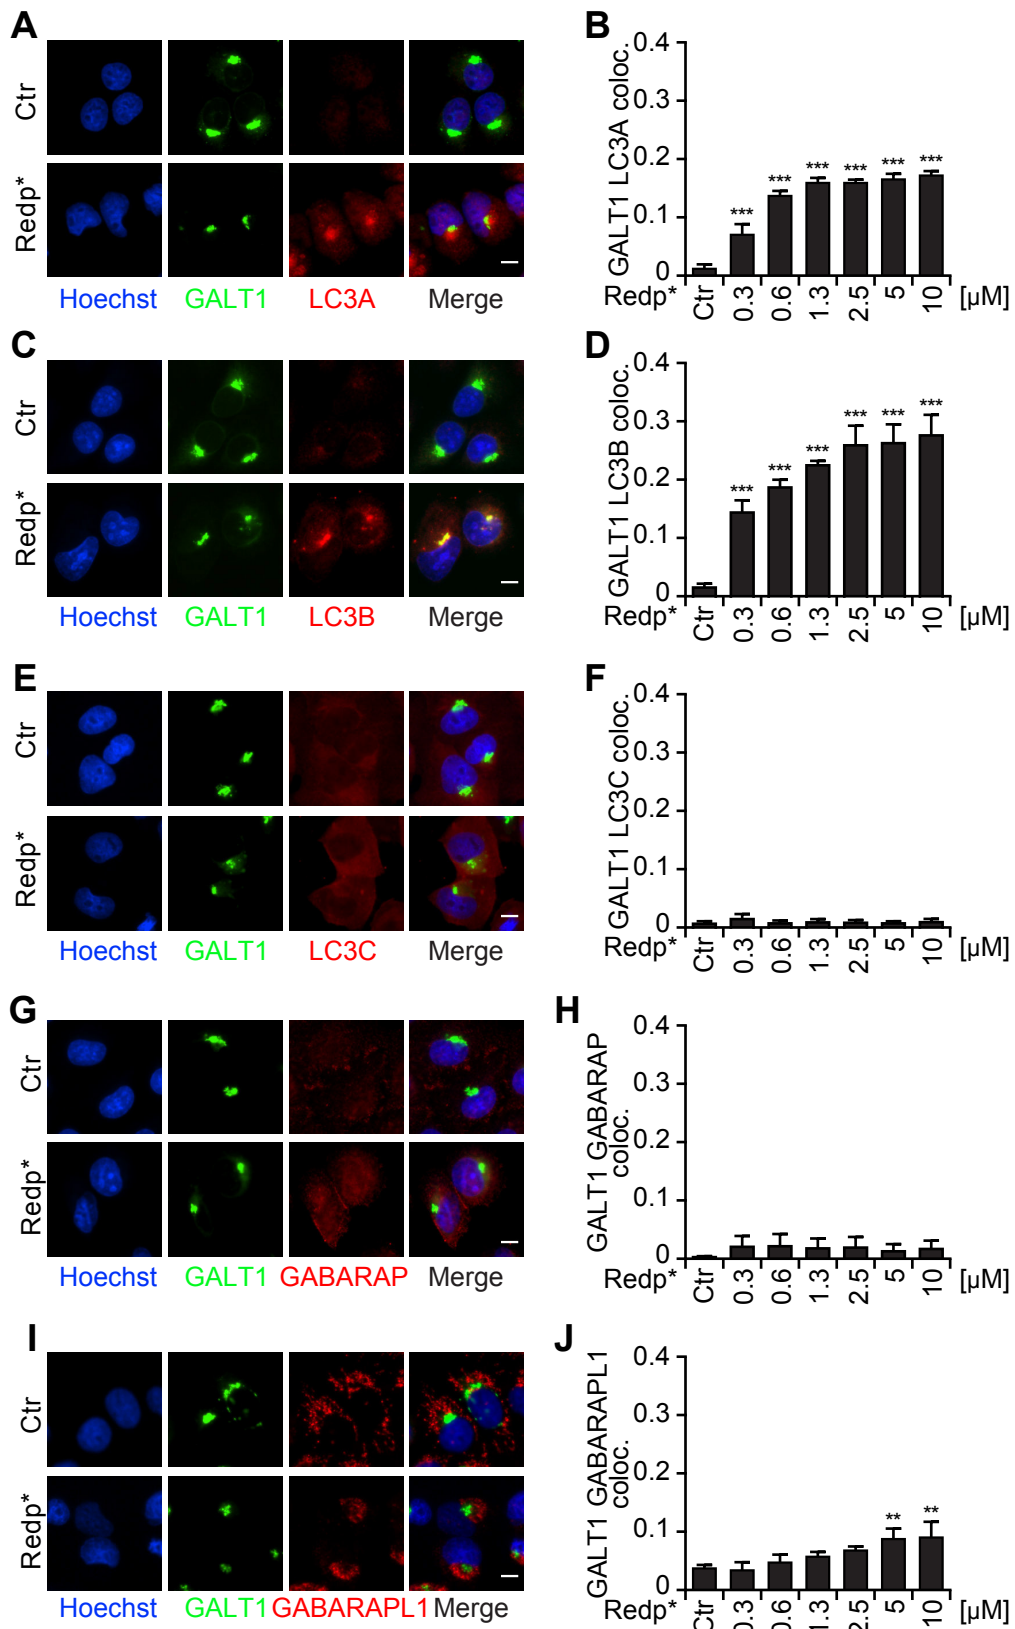

**Figure S4**

Supplement: 41418_2018_221_MOESM4_ESM.pdf [file 41418_2018_221_MOESM4_ESM.pdf]

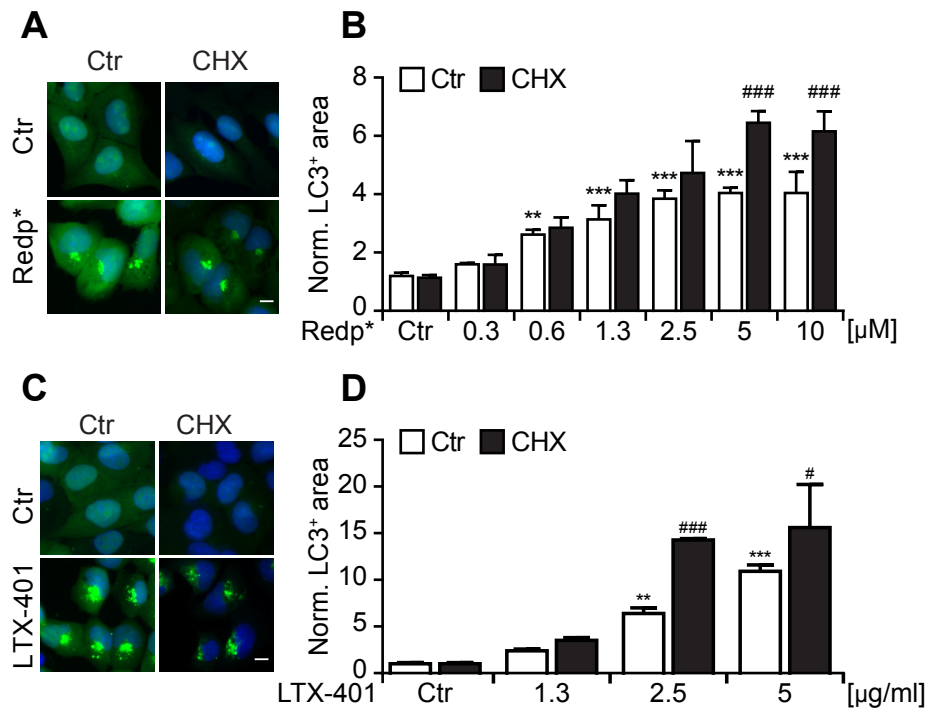

**Figure S5**

Supplement: 41418_2018_221_MOESM5_ESM.pdf [file 41418_2018_221_MOESM5_ESM.pdf]

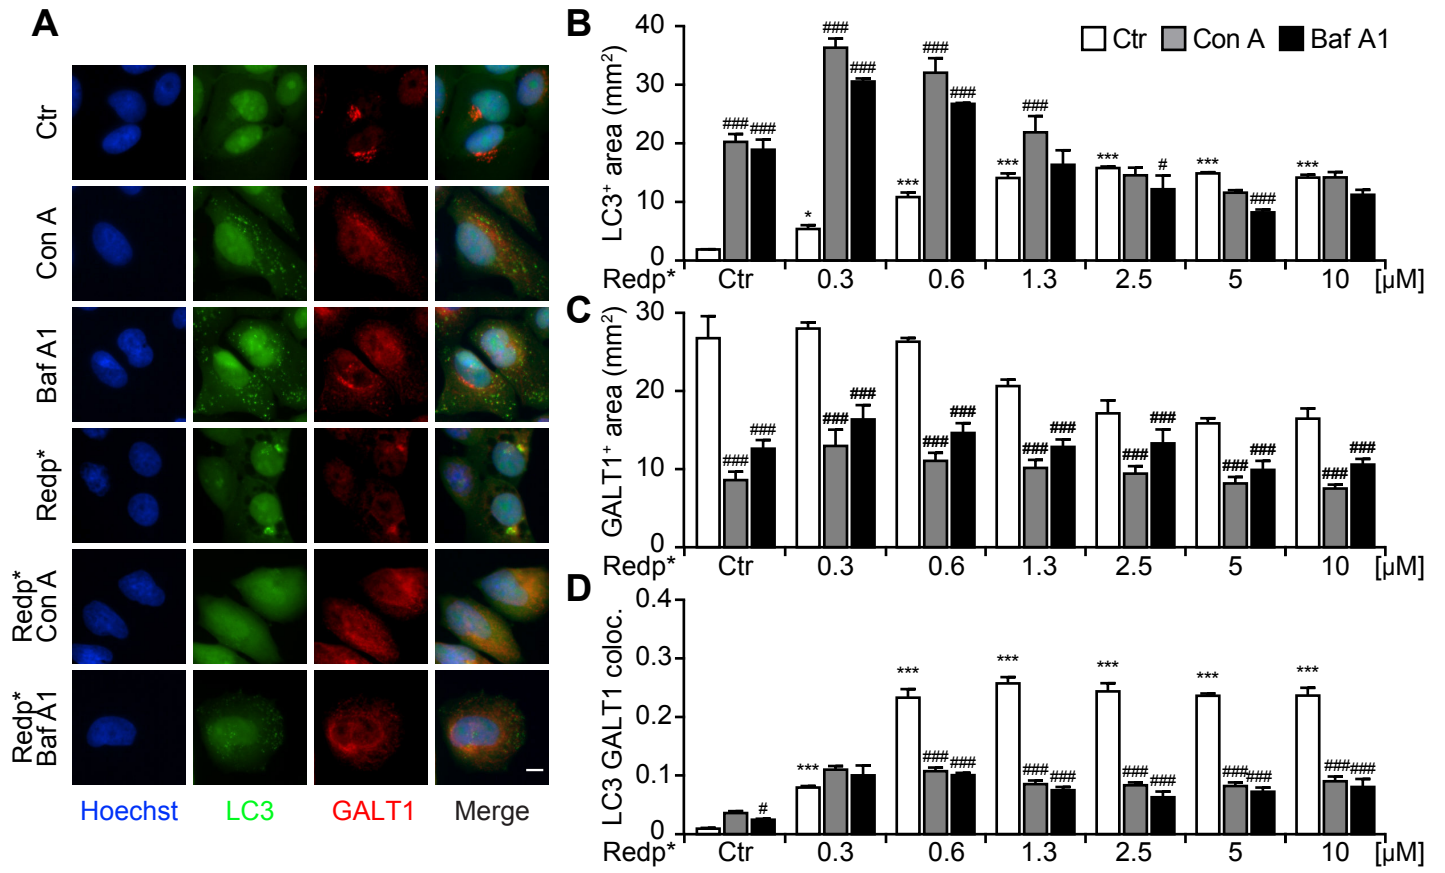

**Figure S6**

Supplement: 41418_2018_221_MOESM6_ESM.pdf [file 41418_2018_221_MOESM6_ESM.pdf]

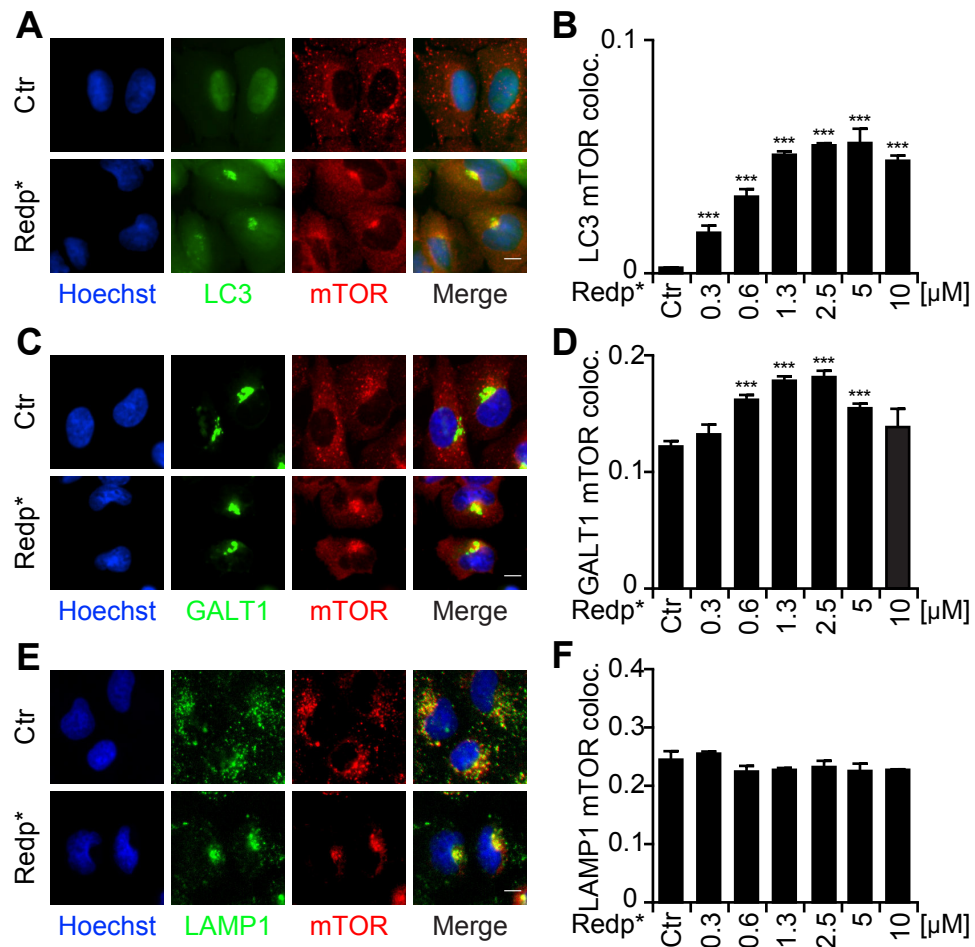

**Figure S7**

Supplement: 41418_2018_221_MOESM7_ESM.pdf [file 41418_2018_221_MOESM7_ESM.pdf]

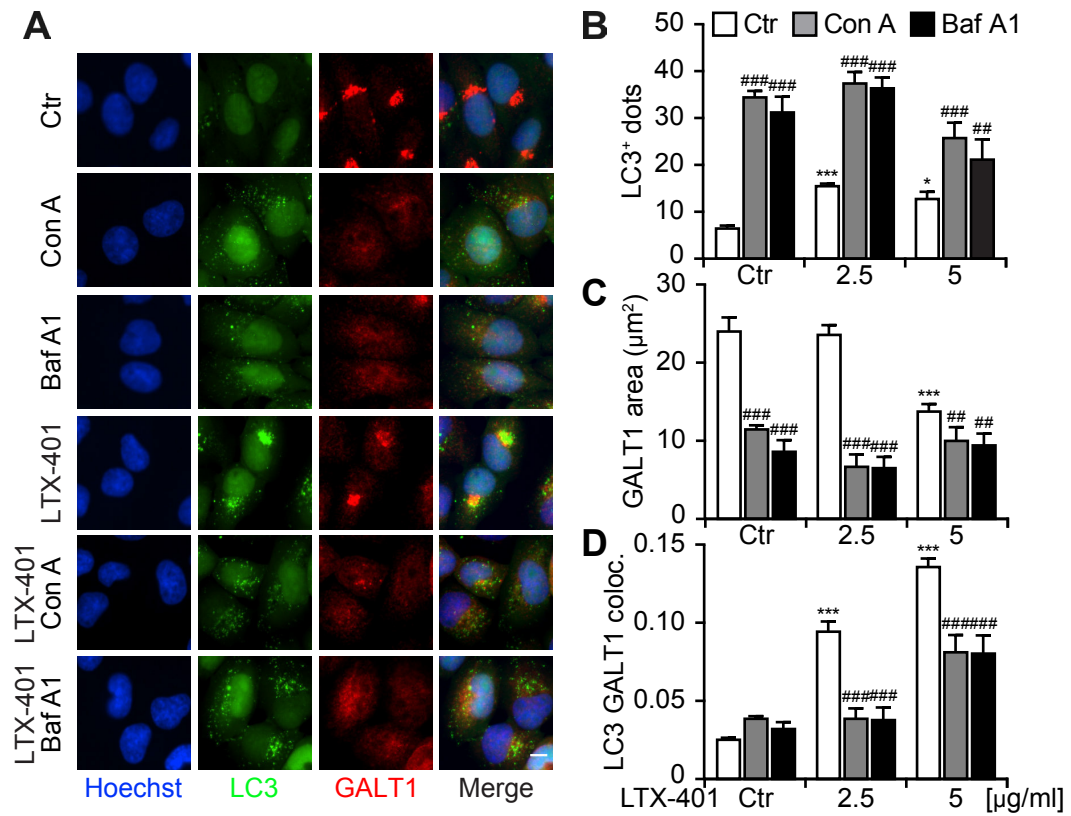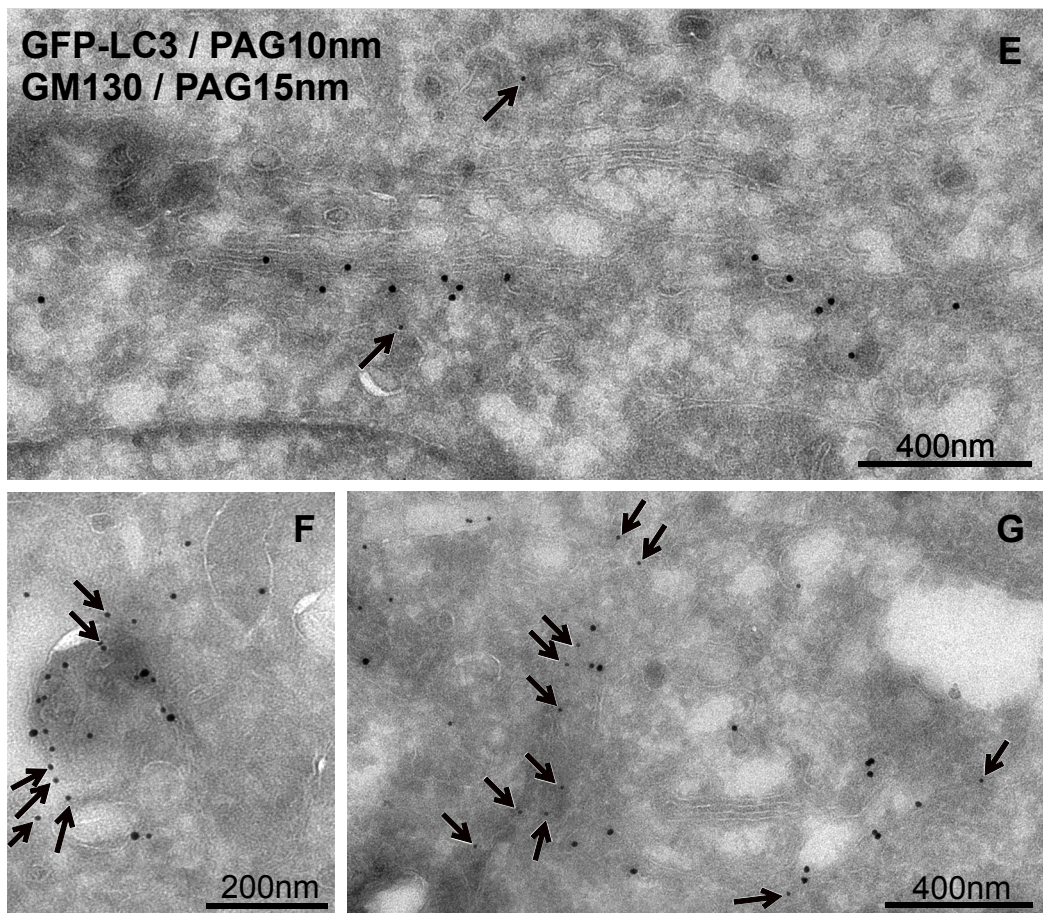

**Figure S8**

Supplement: 41418_2018_221_MOESM8_ESM.pdf [file 41418_2018_221_MOESM8_ESM.pdf]

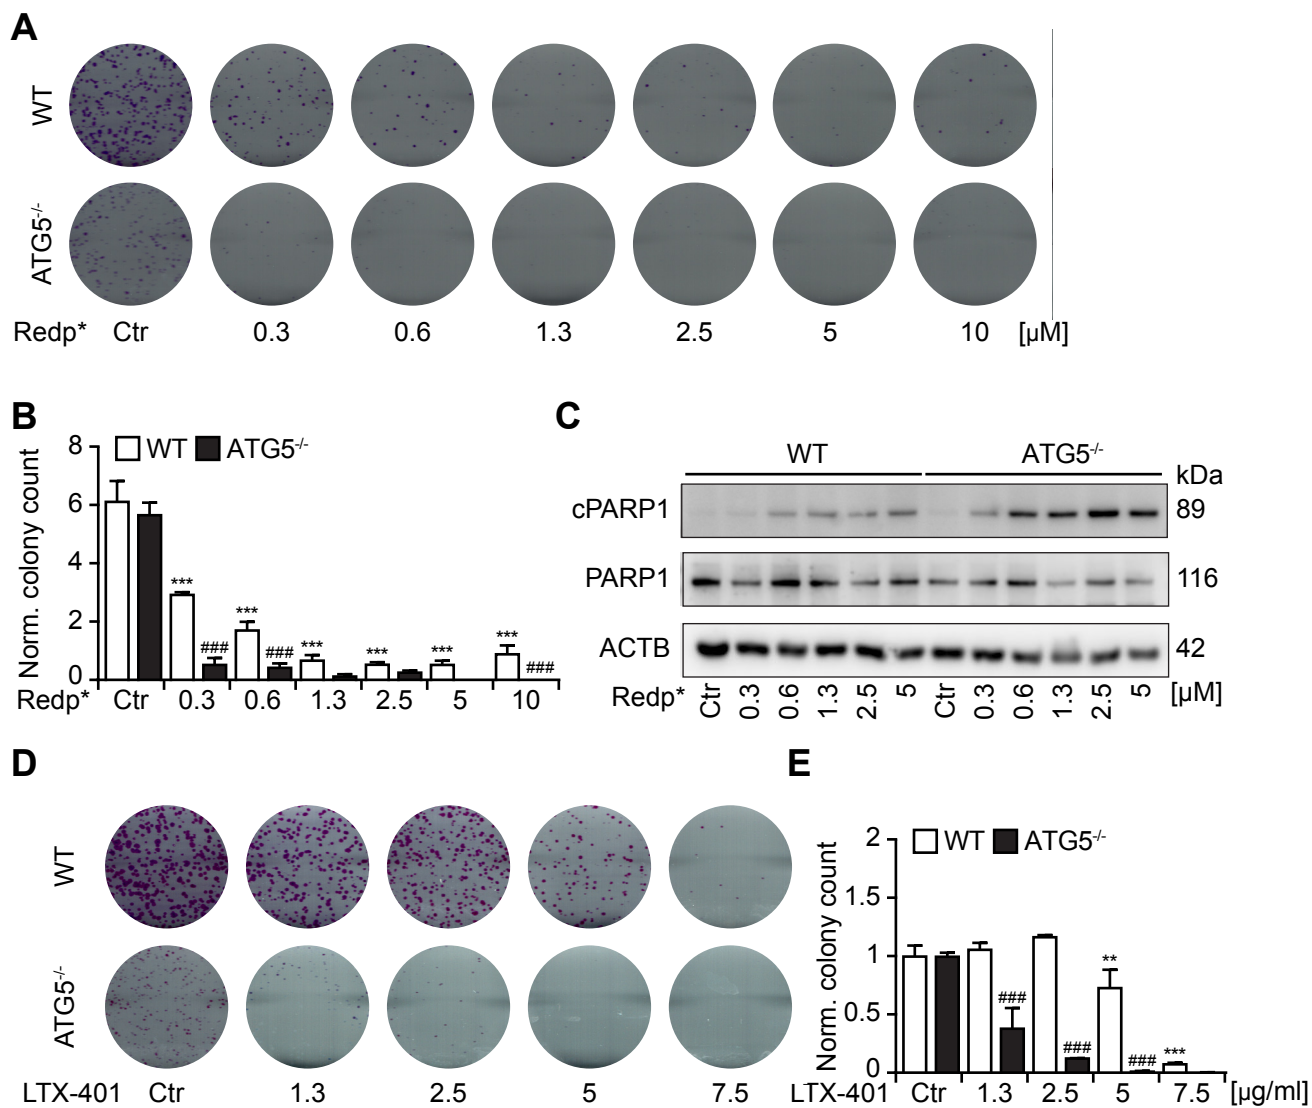

**Figure S9**

Supplement: 41418_2018_221_MOESM9_ESM.pdf [file 41418_2018_221_MOESM9_ESM.pdf]
